### Erratum

#### **Buprenorphine Depresses Respiratory Variability in Obese Mice with Altered Leptin Signaling: Erratum**

In the Online First article published on February 2, 2018, there were errors in figure 3C and figure 3D. In both panels, there was a black dot appearing to the right of the red bar. This dot was extraneous and has been deleted.

The publisher regrets this error. The online version and PDF of the article have been corrected.

#### **Reference**

Angel C, Glovak ZT, Alami W, Mihalko S, Price J, Jiang Y, Baghdoyan HA, Lydic R: Buprenorphine depresses respiratory variability in obese mice with altered leptin signaling. *ANESTHESIOLOGY* 2018; doi: 10.1097/ALN.0000000000002073. [Epub ahead of print]

### Erratum

#### **Association of Hospital-level Neuraxial Anesthesia Use for Hip Fracture Surgery with Outcomes: A Population-based Cohort Study: Erratum**

In the article beginning on page 480 in the March 2018 issue, Dr. Wijeyesundera's credentials were listed incorrectly in the byline. They should have appeared as Duminda N. Wijeyesundera, M.D., Ph.D., F.R.C.P.C.

In addition, in the second line of text on page 489, only reference 38 should be cited. The citation for reference 4 should be removed.

The authors regret these errors. The online version and PDF of the article have been corrected.

#### **Reference**

McIsaac DI, Wijeyesundera DN, Huang A, Bryson GL, van Walraven C: Association of hospital-level neuraxial anesthesia use for hip fracture surgery with outcomes: A population-based cohort study. *ANESTHESIOLOGY* 2018; 128:480–91

### Erratum

#### **Targeted Genotyping Identifies Susceptibility Locus in Brain-derived Neurotrophic Factor Gene for Chronic Postsurgical Pain: Erratum**

In the article beginning on page 587 in the March 2018 issue, additional clarification is needed in the abstract and discussion sections.

The last sentence of the abstract currently reads, "This study demonstrated that genetic variation of BDNF is associated with an increased risk of chronic postsurgical pain." It should read, "This study demonstrated that genetic variant of BDNF rs6265G>A is associated with decreased risk of chronic postsurgical pain."

The first sentence of the last paragraph in the discussion currently reads, "Taken together, our data suggest that SNP at rs6265 in BDNF was associated with higher risk of chronic postsurgical pain." It should read, "Taken together, our data suggest that the variant of BDNF rs6265G>A was associated with lower risk of chronic postsurgical pain."

The online version and PDF of the article have been corrected.

#### **Reference**

Tian Y, Liu X, Jia M, Yu H, Lichtner P, Shi Y, Meng Z, Kou S, Ho IHT, Jia B, Cheng BCP, Lam CKM, Tsang S, Wong SH, Yu J, Cheng CHK, Gin T, Wu WKK, Chen Z, Chan MTV; Persistent Pain after Surgery Study Investigators: Targeted genotyping identifies susceptibility locus in brain-derived neurotrophic factor gene for chronic postsurgical pain. *ANESTHESIOLOGY* 2018; 128:587–97
